# Supplementary material for: Molybdenum Complexes Derived from 2-Hydroxy-5-nitrobenzaldehyde and Benzhydrazide as Potential Oxidation Catalysts and Semiconductors
Source: MDPI journal article supplement (doi:10.3390/ijms25094859), 2024-04-29
Supplement: s1 [file s1]

# Molybdenum complexes derived from 2-hydroxy-5-nitrobenzaldehyde and benzhydrazide as potential oxidation catalysts and semiconductors (Supporting Information)

Jana Pisk, Mia Šušković, Edi Topić, Dominique Agustin, Nenad Judaš and Luka Pavić

## Table of Contents

|                                                                                                                                                                                                                                                                                                                                                                                                                                                                                                                                                                                                                                                                                                                                                                                                                                                                                                                                                        |    |
|--------------------------------------------------------------------------------------------------------------------------------------------------------------------------------------------------------------------------------------------------------------------------------------------------------------------------------------------------------------------------------------------------------------------------------------------------------------------------------------------------------------------------------------------------------------------------------------------------------------------------------------------------------------------------------------------------------------------------------------------------------------------------------------------------------------------------------------------------------------------------------------------------------------------------------------------------------|----|
| Figure S1. IR spectra of $[\text{MoO}_2(\text{L})(\text{MeOH})]$ ( <b>1</b> ) complex.....                                                                                                                                                                                                                                                                                                                                                                                                                                                                                                                                                                                                                                                                                                                                                                                                                                                             | 2  |
| Figure S2. IR spectra of $[\text{MoO}_2(\text{L})(\text{H}_2\text{O})]$ ( <b>2</b> ) complex.....                                                                                                                                                                                                                                                                                                                                                                                                                                                                                                                                                                                                                                                                                                                                                                                                                                                      | 2  |
| Figure S3. IR spectra of $[(\text{MoO}_2(\text{L}))_2(4,4\text{-bpy})]$ ( <b>3</b> ) complex.....                                                                                                                                                                                                                                                                                                                                                                                                                                                                                                                                                                                                                                                                                                                                                                                                                                                      | 3  |
| Figure S4. Comparison of IR spectra: residue after TG analysis (orange curve), commercially available $\text{MoO}_3$ (black curve). ....                                                                                                                                                                                                                                                                                                                                                                                                                                                                                                                                                                                                                                                                                                                                                                                                               | 3  |
| Figure S5. DSC curve for the ligand $\text{H}_2\text{L}$ . ....                                                                                                                                                                                                                                                                                                                                                                                                                                                                                                                                                                                                                                                                                                                                                                                                                                                                                        | 4  |
| Figure S6. TG curve of $[\text{MoO}_2(\text{L})(\text{MeOH})]$ ( <b>1</b> ) complex. ....                                                                                                                                                                                                                                                                                                                                                                                                                                                                                                                                                                                                                                                                                                                                                                                                                                                              | 4  |
| Figure S7. TG curve of $[\text{MoO}_2(\text{L})(\text{H}_2\text{O})]$ ( <b>2</b> ) complex.....                                                                                                                                                                                                                                                                                                                                                                                                                                                                                                                                                                                                                                                                                                                                                                                                                                                        | 5  |
| Figure S8. TG of $[(\text{MoO}_2(\text{L}))_2(4,4\text{-bpy})]$ ( <b>3</b> ) complex.....                                                                                                                                                                                                                                                                                                                                                                                                                                                                                                                                                                                                                                                                                                                                                                                                                                                              | 5  |
| <b>Table S1.</b> Experimental and crystallographic data for complexes $[\text{MoO}_2(\text{L})(\text{MeOH})]$ ( <b>1</b> ), $[\text{MoO}_2(\text{L})(\text{H}_2\text{O})]$ ( <b>2</b> ) and $[(\text{MoO}_2(\text{L}))_2(4,4\text{-bpy})]$ ( <b>3</b> ).....                                                                                                                                                                                                                                                                                                                                                                                                                                                                                                                                                                                                                                                                                           | 6  |
| <b>Table S2.</b> Selected bond lengths in the crystal structures of $[\text{MoO}_2(\text{L})(\text{MeOH})]$ ( <b>1</b> ), $[\text{MoO}_2(\text{L})(\text{H}_2\text{O})]$ ( <b>2</b> ) and $[(\text{MoO}_2(\text{L}))_2(4,4\text{-bpy})]$ ( <b>3</b> ).....                                                                                                                                                                                                                                                                                                                                                                                                                                                                                                                                                                                                                                                                                             | 7  |
| <b>Table S3.</b> Hydrogen bond parameters in the crystal structures of prepared complexes $[\text{MoO}_2(\text{L})(\text{MeOH})]$ ( <b>1</b> ), $[\text{MoO}_2(\text{L})(\text{H}_2\text{O})]$ ( <b>2</b> ) and $[(\text{MoO}_2(\text{L}))_2(4,4\text{-bpy})]$ ( <b>3</b> ).....                                                                                                                                                                                                                                                                                                                                                                                                                                                                                                                                                                                                                                                                       | 8  |
| <b>Figure S9.</b> (a) Molecular structure of $[\text{MoO}_2(\text{L})(\text{MeOH})]$ ( <b>1</b> ). Atoms are shown as thermal ellipsoid with 50% probability level. The asymmetric unit contains one whole molecule of the complex. (b) Packing of mononuclear complexes $[\text{MoO}_2(\text{L})(\text{MeOH})]$ ( <b>1</b> ) in the crystal structure. The molecules form supramolecular $R22(10)$ homodimers formed by methanol $\text{O}-\text{H}\cdots\text{N1}$ imido hydrogen bonds. No other significant interactions between the dimers are observed.....                                                                                                                                                                                                                                                                                                                                                                                      | 9  |
| <b>Figure S10.</b> (a) Molecular structure of $[\text{MoO}_2(\text{L})(\text{H}_2\text{O})]$ ( <b>2</b> ). Atoms are shown as thermal ellipsoid with a 50% probability level. The asymmetric unit contains one whole molecule of the complex. (b) Packing of mononuclear complexes $[\text{MoO}_2(\text{L})(\text{H}_2\text{O})]$ ( <b>2</b> ) in the crystal structure. The molecules form supramolecular $C44(26)$ chains spanning through water $\text{O}-\text{H}\cdots\text{O6}(\text{nitro})$ hydrogen bonds and water $\text{O}-\text{H}\cdots\text{N1}$ imido hydrogen bond. The latter enables the formation of supramolecular homodimers connected via hydrogen bonds with nitro moiety. (c) Packing of mononuclear complexes <b>2</b> in the crystal structure. Molecules are colored by symmetry operation, showing the formation of supramolecular dimers bridged by $\text{O}-\text{H}\cdots\text{O6}(\text{nitro})$ hydrogen bonds..... | 11 |
| <b>Figure S11.</b> (a) Molecular structure of $[(\text{MoO}_2(\text{L}))_2(4,4\text{-bpy})]$ ( <b>3</b> ). Atoms are shown as thermal ellipsoid with a 50% probability level. The asymmetric unit contains the upper half of the shown molecule only (center of inversion is situated at the midpoint of 4,4'-bpy C-C bond). (b) Packing of dinuclear complexes $[(\text{MoO}_2(\text{L}))_2(4,4\text{-bpy})]$ ( <b>3</b> ) in the crystal structure. The molecules do not form any significant intermolecular interactions due to the lack of hydrogen bond donors. ....                                                                                                                                                                                                                                                                                                                                                                              | 12 |

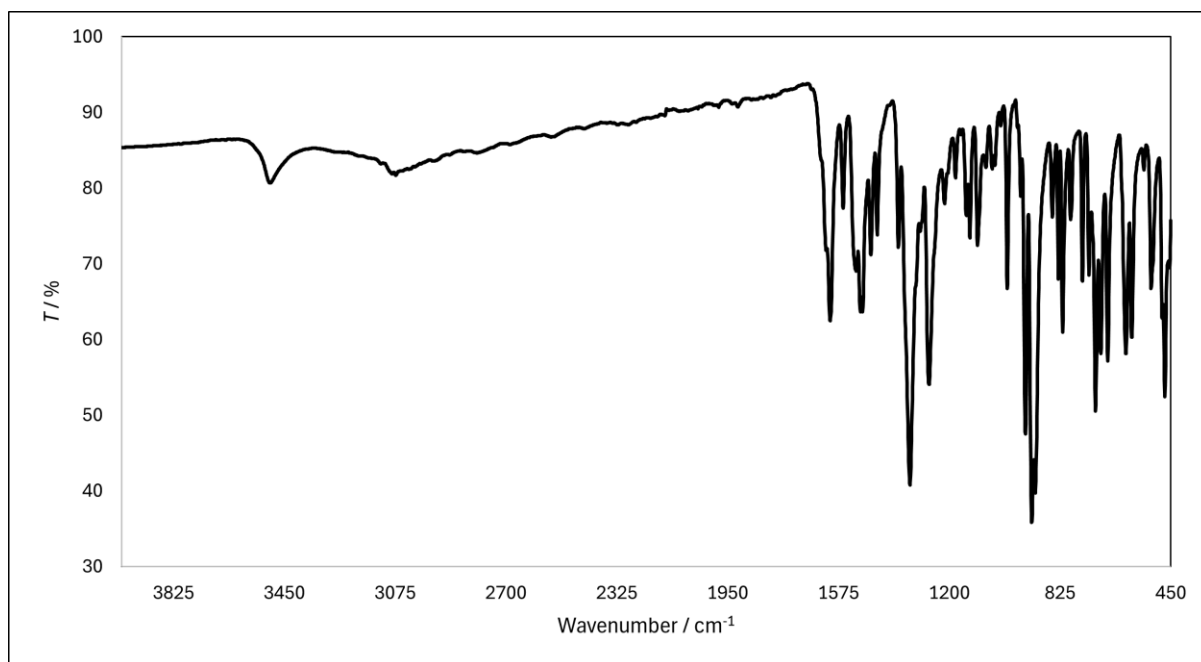

Figure S1. IR spectra of  $[\text{MoO}_2(\text{L})(\text{MeOH})]$  (1) complex.

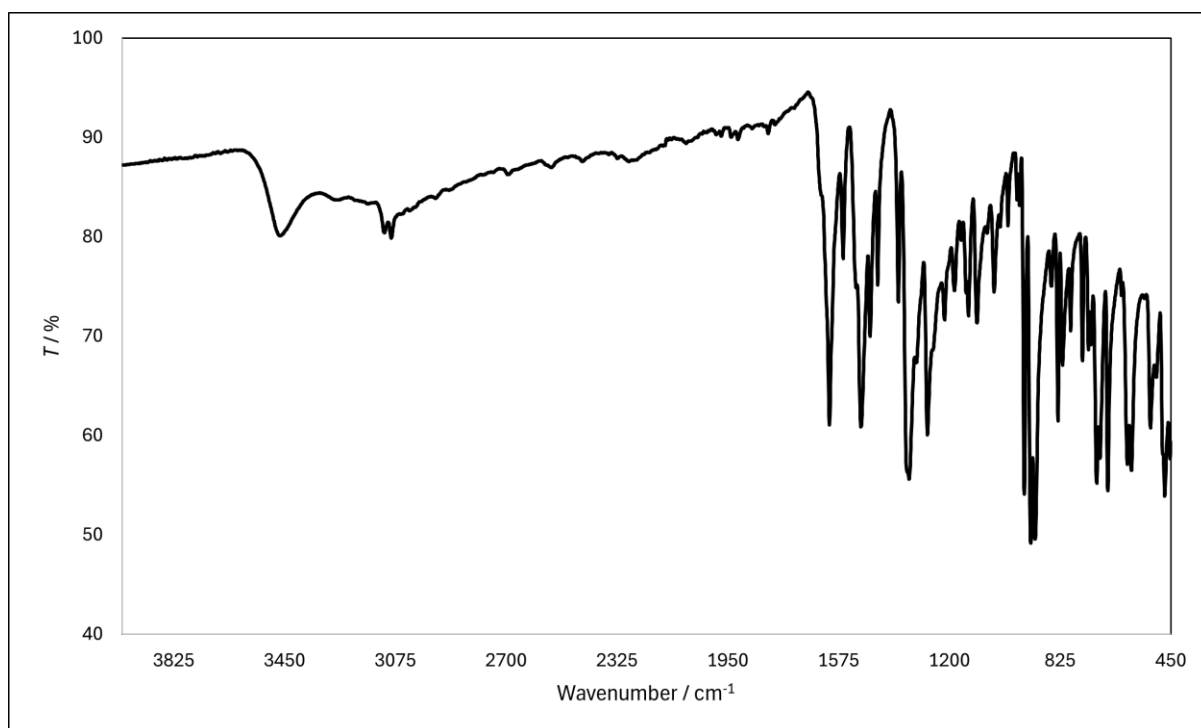

Figure S2. IR spectra of  $[\text{MoO}_2(\text{L})(\text{H}_2\text{O})]$  (2) complex.

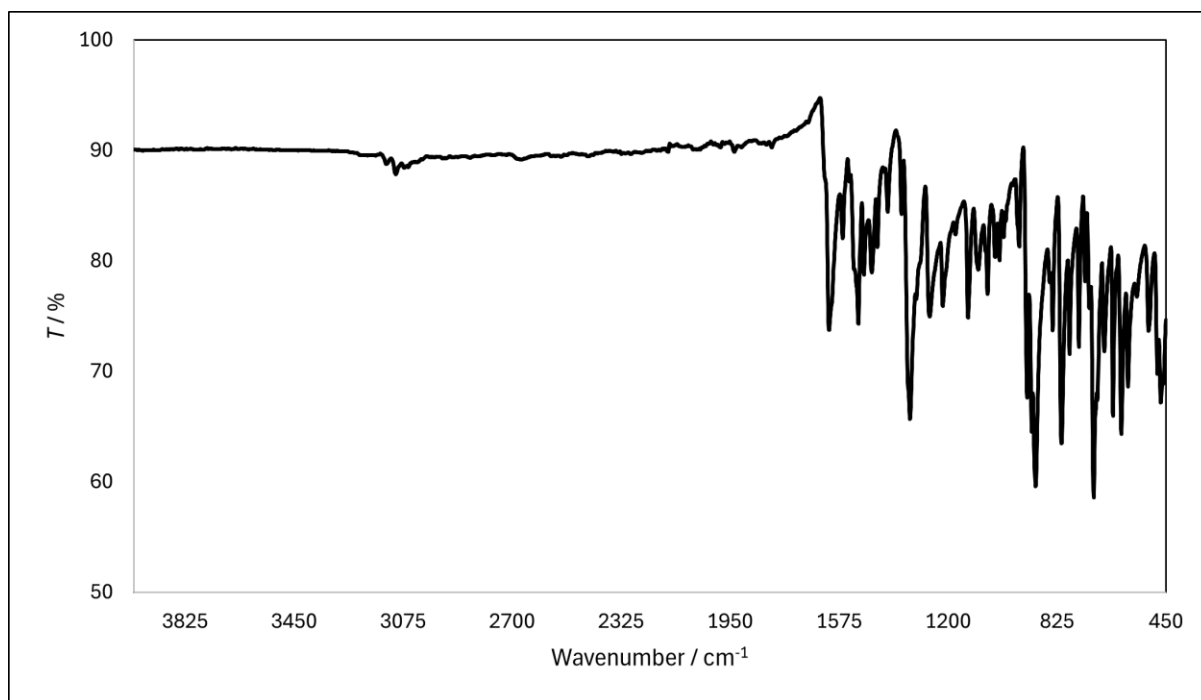

Figure S3. IR spectra of  $[(\text{MoO}_2(\text{L}))_2(4,4\text{-bpy})]$  (**3**) complex.

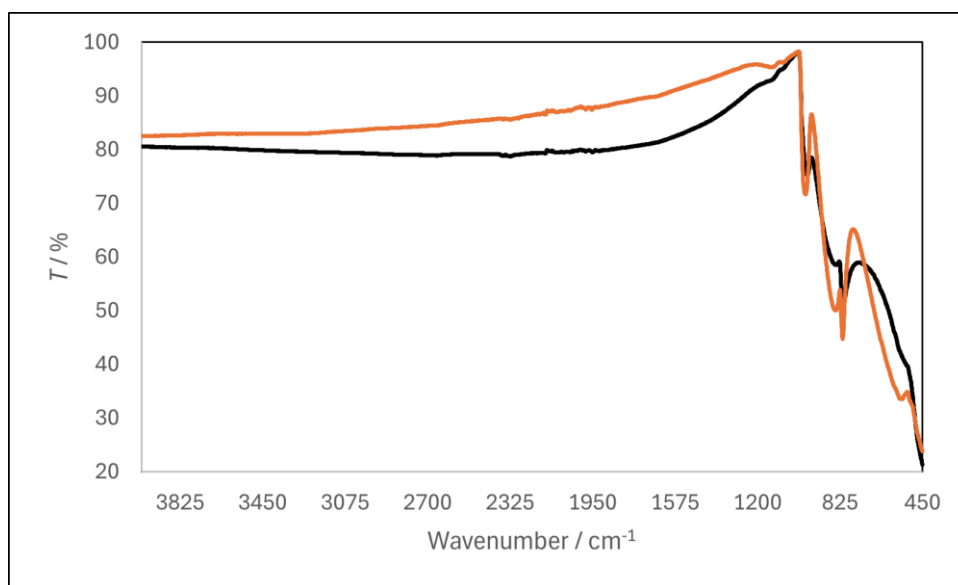

Figure S4. Comparison of IR spectra: residue after TG analysis (orange curve), commercially available MoO<sub>3</sub>(black curve).

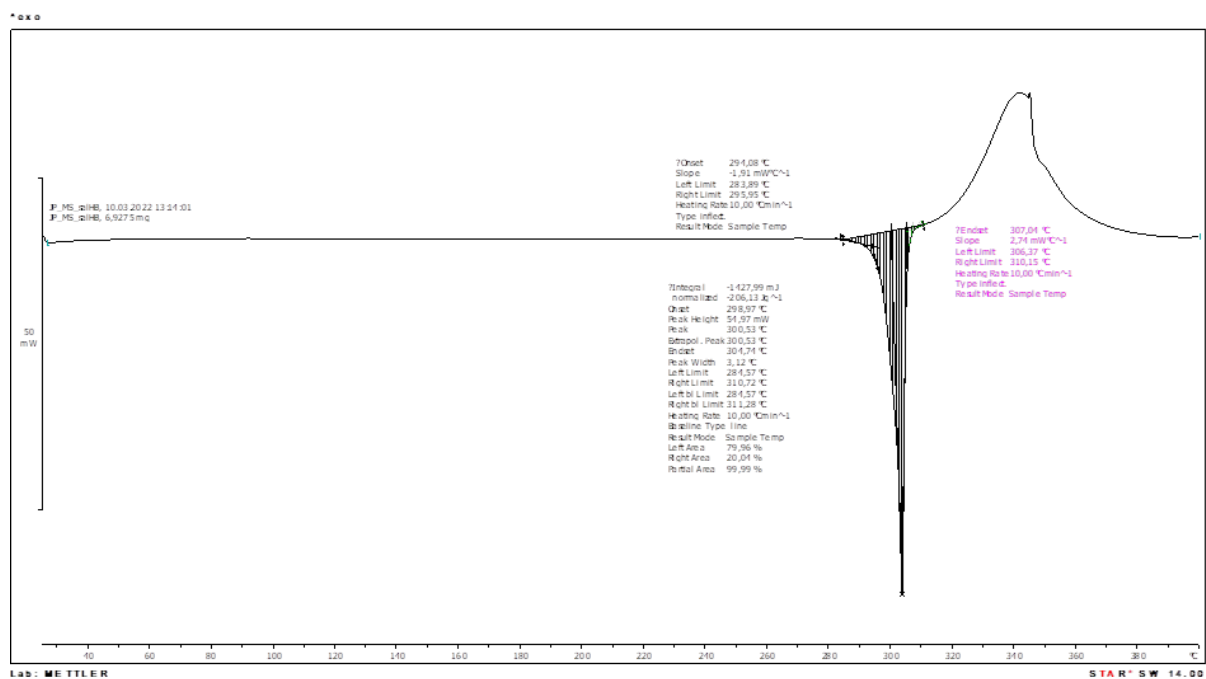

Figure S5. DSC curve for the ligand H<sub>2</sub>L.

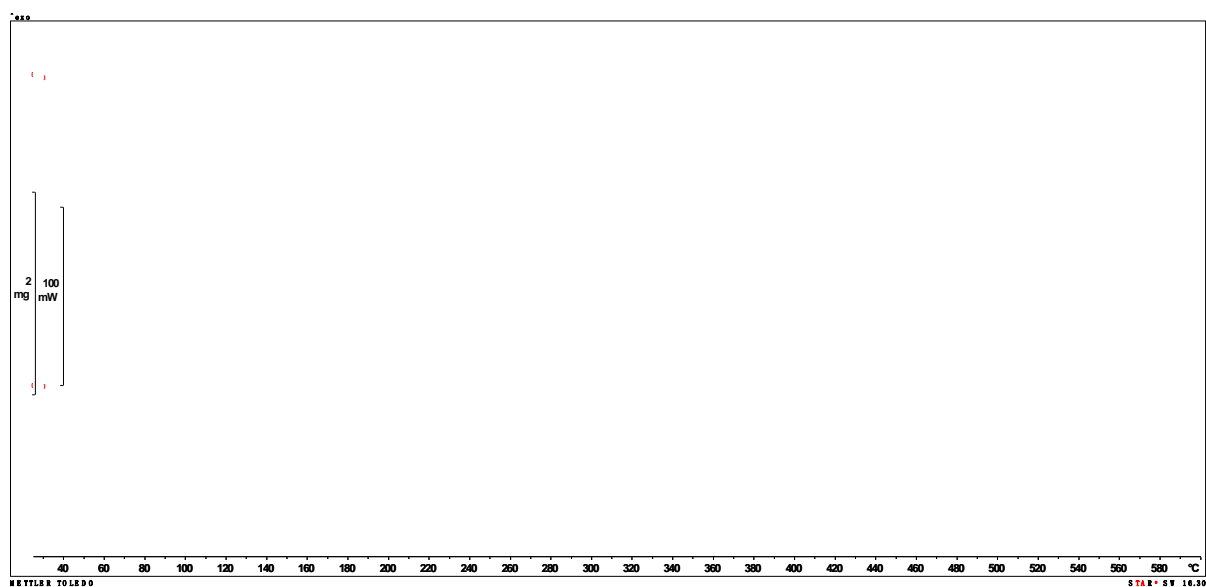

Figure S6. TG curve of [MoO<sub>2</sub>(L)(MeOH)] (**1**) complex.

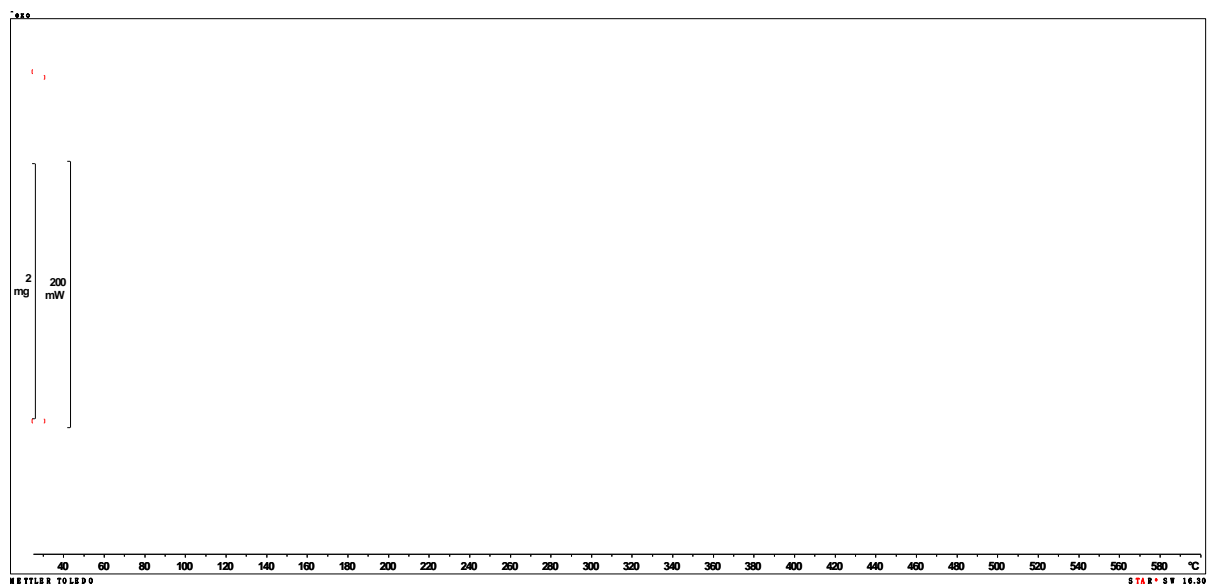

Figure S7. TG curve of  $[\text{MoO}_2(\text{L})(\text{H}_2\text{O})]$  (2) complex.

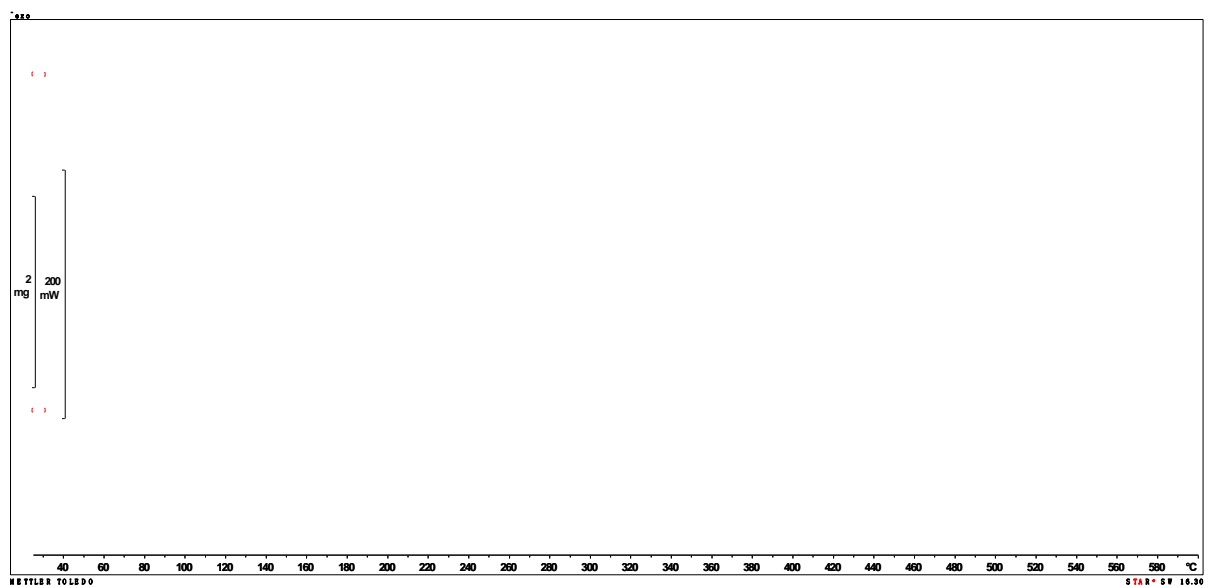

Figure S8. TG of  $[(\text{MoO}_2(\text{L}))_2(4,4\text{-bpy})]$  (3) complex.

**Table S1.** Experimental and crystallographic data for complexes [MoO<sub>2</sub>(L)(MeOH)] (**1**), [MoO<sub>2</sub>(L)(H<sub>2</sub>O)] (**2**) and [(MoO<sub>2</sub>(L))<sub>2</sub>(4,4-bpy)] (**3**).

| Identifier                                                                             | [MoO <sub>2</sub> (L)(MeOH)] ( <b>1</b> )                                      | [MoO <sub>2</sub> (L)(H <sub>2</sub> O)] ( <b>2</b> )                          | [(MoO <sub>2</sub> (L)) <sub>2</sub> (4,4-bpy)] ( <b>3</b> )                   |
|----------------------------------------------------------------------------------------|--------------------------------------------------------------------------------|--------------------------------------------------------------------------------|--------------------------------------------------------------------------------|
| Empirical formula                                                                      | C <sub>15</sub> H <sub>13</sub> MoN <sub>3</sub> O <sub>7</sub>                | C <sub>14</sub> H <sub>11</sub> MoN <sub>3</sub> O <sub>7</sub>                | C <sub>38</sub> H <sub>26</sub> Mo <sub>2</sub> N <sub>8</sub> O <sub>12</sub> |
| <i>M<sub>r</sub></i>                                                                   | 443.22                                                                         | 429.20                                                                         | 978.55                                                                         |
| <i>T</i> /K                                                                            | 170(2)                                                                         | 169.98(10)                                                                     | 169.99(10)                                                                     |
| Crystal system                                                                         | triclinic, yellow needle                                                       | monoclinic, yellow plate                                                       | monoclinic, yellow plate                                                       |
| Space group                                                                            | <i>P</i> $\bar{1}$                                                             | <i>P</i> 1 2 <sub>1</sub> /c 1                                                 | <i>P</i> 1 2 <sub>1</sub> /n 1                                                 |
| <i>a</i> /Å                                                                            | 7.9589(3)                                                                      | 10.8039(7)                                                                     | 13.1888(4)                                                                     |
| <i>b</i> /Å                                                                            | 9.5589(3)                                                                      | 10.7689(6)                                                                     | 10.5504(3)                                                                     |
| <i>c</i> /Å                                                                            | 10.5117(3)                                                                     | 13.5832(8)                                                                     | 14.1743(4)                                                                     |
| $\alpha$ /°                                                                            | 83.639(2)                                                                      | 90                                                                             | 90                                                                             |
| $\beta$ /°                                                                             | 88.860(3)                                                                      | 108.087(7)                                                                     | 106.292(3)                                                                     |
| $\gamma$ /°                                                                            | 89.126(3)                                                                      | 90                                                                             | 90                                                                             |
| <i>V</i> /Å <sup>3</sup>                                                               | 794.56(4)                                                                      | 1502.26(17)                                                                    | 1893.11(10)                                                                    |
| <i>Z</i>                                                                               | 2                                                                              | 4                                                                              | 2                                                                              |
| $\rho_{\text{calc}}$ /g cm <sup>-3</sup>                                               | 1.853                                                                          | 1.898                                                                          | 1.717                                                                          |
| $\mu$ /mm <sup>-1</sup>                                                                | 7.200                                                                          | 7.592                                                                          | 6.092                                                                          |
| <i>F</i> (000)                                                                         | 444                                                                            | 856                                                                            | 980                                                                            |
| Crystal size/mm <sup>3</sup>                                                           | 0.08×0.03×0.03                                                                 | 0.08×0.05×0.004                                                                | 0.3×0.08×0.02                                                                  |
| Radiation                                                                              |                                                                                |                                                                                | Cu K $\alpha$ ( $\lambda$ = 1.54184 Å)                                         |
| 2 $\Theta$ range/°                                                                     | 8.466 to 155.052                                                               | 8.61 to 154.716                                                                | 8.096 to 155.81                                                                |
| Index ranges                                                                           | −10 ≤ <i>h</i> ≤ 10,<br>−12 ≤ <i>k</i> ≤ 9,<br>−13 ≤ <i>l</i> ≤ 13             | −13 ≤ <i>h</i> ≤ 12,<br>−13 ≤ <i>k</i> ≤ 13,<br>−16 ≤ <i>l</i> ≤ 15            | −16 ≤ <i>h</i> ≤ 16,<br>−13 ≤ <i>k</i> ≤ 13,<br>−16 ≤ <i>l</i> ≤ 17            |
| Reflections collected                                                                  | 12446                                                                          | 10107                                                                          | 21369                                                                          |
| Independent reflections                                                                | 3268 [ <i>R</i> <sub>int</sub> = 3.58%,<br><i>R</i> <sub>sigma</sub> = 4.08 %] | 3007 [ <i>R</i> <sub>int</sub> = 6.13%,<br><i>R</i> <sub>sigma</sub> = 6.47 %] | 4006 [ <i>R</i> <sub>int</sub> = 6.9%, <i>R</i> <sub>sigma</sub><br>= 10.16 %] |
| Data/restraints/parameters                                                             | 3268/-/239                                                                     | 3007/-/227                                                                     | 4006/-/271                                                                     |
| <i>g</i> <sub>1</sub> , <i>g</i> <sub>2</sub> in <i>w</i> <sup>a</sup>                 | 0.0579, 1.3589                                                                 | 0.0531, 46.7310                                                                | 0.1059, 0                                                                      |
| Goodness-of-fit on <i>F</i> <sup>2</sup> , <i>S</i> <sup>b</sup>                       | 1.079                                                                          | 1.057                                                                          | 1.048                                                                          |
| Final <i>R</i> and <i>wR</i> <sup>c</sup> values [ <i>I</i> ≥ 2 $\sigma$ ( <i>I</i> )] | <i>R</i> <sub>1</sub> = 3.62%, <i>wR</i> <sub>2</sub> = 9.81%                  | <i>R</i> <sub>1</sub> = 8.67%, <i>wR</i> <sub>2</sub> = 21.35%                 | <i>R</i> <sub>1</sub> = 5.19%, <i>wR</i> <sub>2</sub> = 14.31%                 |
| Final <i>R</i> and <i>wR</i> <sup>c</sup> values [all data]                            | <i>R</i> <sub>1</sub> = 3.86%, <i>wR</i> <sub>2</sub> = 9.98%                  | <i>R</i> <sub>1</sub> = 11.31%, <i>wR</i> <sub>2</sub> = 22.69%                | <i>R</i> <sub>1</sub> = 5.71%, <i>wR</i> <sub>2</sub> = 15.02%                 |
| Largest diff. peak/hole / e Å <sup>-3</sup>                                            | 1.076/−1.187                                                                   | 3.097/−1.384                                                                   | 0.873/−1.330                                                                   |

<sup>a</sup> $w = 1/[\sigma F_o^2 + (g_1 P)^2 + g_2 P]$  where  $P = (F_o^2 + 2F_c^2)/3$

<sup>b</sup> $S = \{\Sigma[w(F_o^2 - F_c^2)2]/(N_r - N_p)\}^{1/2}$  where *N<sub>r</sub>* = number of independent reflections, *N<sub>p</sub>* = number of refined parameters.

<sup>c</sup> $R = \Sigma||F_o| - |F_c||/\Sigma|F_o|$ ;  $wR = \{\Sigma[w(F_o^2 - F_c^2)2]/\Sigma[w(F_o^2)2]\}^{1/2}$

**Table S2.** Selected bond lengths in the crystal structures of [MoO<sub>2</sub>(L)(MeOH)] (**1**), [MoO<sub>2</sub>(L)(H<sub>2</sub>O)] (**2**) and [(MoO<sub>2</sub>(L))<sub>2</sub>(4,4-bpy)] (**3**).

| [MoO <sub>2</sub> (L)(MeOH)] ( <b>1</b> )                    |               |         |               |        |               |
|--------------------------------------------------------------|---------------|---------|---------------|--------|---------------|
| Atoms                                                        | Bond length/Å | Atoms   | Bond length/Å | Atoms  | Bond length/Å |
| C2–C3                                                        | 1.390(5)      | C12–C13 | 1.392(5)      | N1–N2  | 1.400(4)      |
| C2–C7                                                        | 1.396(4)      | Mo1–N2  | 2.260(3)      | O1–C1  | 1.312(4)      |
| C3–C4                                                        | 1.391(5)      | Mo1–O1  | 2.007(2)      | O2–C10 | 1.326(4)      |
| C4–C5                                                        | 1.385(5)      | Mo1–O2  | 1.939(2)      | O5–C15 | 1.423(6)      |
| C9–C14                                                       | 1.394(4)      | Mo1–O3  | 1.696(3)      | O6–N3  | 1.221(4)      |
| C10–C11                                                      | 1.409(5)      | Mo1–O4  | 1.702(3)      | O7–N3  | 1.223(4)      |
| C11–C12                                                      | 1.371(6)      | Mo1–O5  | 2.309(2)      |        |               |
| [MoO <sub>2</sub> (L)(H <sub>2</sub> O)] ( <b>2</b> )        |               |         |               |        |               |
| Atoms                                                        | Bond length/Å | Atoms   | Bond length/Å | Atoms  | Bond length/Å |
| C2–C7                                                        | 1.382(17)     | C13–C14 | 1.385(16)     | N1–C1  | 1.271(16)     |
| C3–C4                                                        | 1.40(2)       | Mo1–N2  | 2.234(10)     | N1–N2  | 1.416(12)     |
| C4–C5                                                        | 1.37(2)       | Mo1–O1  | 2.021(8)      | O1–C1  | 1.316(14)     |
| C5–C6                                                        | 1.38(2)       | Mo1–O2  | 1.940(10)     | O2–C10 | 1.330(17)     |
| C10–C11                                                      | 1.411(17)     | Mo1–O3  | 1.742(12)     | O6–N3  | 1.233(14)     |
| C11–C12                                                      | 1.380(19)     | Mo1–O4  | 1.690(11)     | O7–N3  | 1.210(15)     |
| C12–C13                                                      | 1.375(17)     | Mo1–O5  | 2.270(10)     |        |               |
| [(MoO <sub>2</sub> (L)) <sub>2</sub> (4,4-bpy)] ( <b>3</b> ) |               |         |               |        |               |
| Atoms                                                        | Bond length/Å | Atoms   | Bond length/Å | Atoms  | Bond length/Å |
| C9–C10                                                       | 1.414(5)      | Mo1–N4  | 2.395(3)      | N4–C15 | 1.343(5)      |
| C9–C14                                                       | 1.392(6)      | Mo1–O1  | 1.995(2)      | N4–C19 | 1.339(5)      |
| C10–C11                                                      | 1.396(6)      | Mo1–O2  | 1.950(3)      | O1–C1  | 1.330(4)      |
| C11–C12                                                      | 1.374(6)      | Mo1–O3  | 1.703(3)      | O2–C10 | 1.336(5)      |
| C12–C13                                                      | 1.388(6)      | Mo1–O4  | 1.704(2)      | O5–N3  | 1.229(5)      |
| C13–C14                                                      | 1.367(6)      | N1–C1   | 1.288(5)      | O6–N3  | 1.225(6)      |
| C15–C16                                                      | 1.385(6)      | N1–N2   | 1.397(5)      |        |               |
| C16–C17                                                      | 1.398(5)      | N2–C8   | 1.297(5)      |        |               |
| Mo1–N2                                                       | 2.250(3)      | N3–C13  | 1.466(6)      |        |               |

**Table S3.** Hydrogen bond parameters in the crystal structures of prepared complexes [MoO<sub>2</sub>(L)(MeOH)] (**1**), [MoO<sub>2</sub>(L)(H<sub>2</sub>O)] (**2**) and [(MoO<sub>2</sub>(L))<sub>2</sub>(4,4-bpy)] (**3**)..

| [MoO <sub>2</sub> (L)(MeOH)] ( <b>1</b> )                    |         |         |           |          |                     |
|--------------------------------------------------------------|---------|---------|-----------|----------|---------------------|
| D–H···A                                                      | D–H     | H···A   | D···A     | ∠D–H···A | Symmetry code       |
| O5–H5···N1                                                   | 0.82(5) | 1.97(5) | 2.779(4)  | 171(5)   | 1–x, 1–y, 2–z       |
| C8–H8···O3                                                   | 0.95    | 2.52    | 3.170(4)  | 126      | –x, 1–y, 2–z        |
| [MoO <sub>2</sub> (L)(H <sub>2</sub> O)] ( <b>2</b> )        |         |         |           |          |                     |
| D–H···A                                                      | D–H     | H···A   | D···A     | ∠D–H···A | Symmetry code       |
| O5–H5A···N1                                                  | 0.88    | 2.15    | 2.904(14) | 143      | 1–x, 1–y, 1–z       |
| O5–H5B···O6                                                  | 0.88    | 2.11    | 2.971(15) | 168      | –1+x, 1/2–y, –1/2+z |
| C4–H4···O4                                                   | 0.95    | 2.36    | 3.208(18) | 149      | –x, 1–y, 1–z        |
| C7–H7···O3                                                   | 0.95    | 2.59    | 3.431(18) | 148      | 1–x, 1/2+y, 3/2–z   |
| C8–H8···O7                                                   | 0.95    | 2.59    | 3.402(18) | 144      | 2–x, 1/2+y, 3/2–z   |
| C12–H12···O6                                                 | 0.95    | 2.51    | 3.439(16) | 167      | 2–x, –1/2+y, 3/2–z  |
| C14–H14···O7                                                 | 0.95    | 2.26    | 3.152(16) | 157      | 2–x, 1/2+y, 3/2–z   |
| [(MoO <sub>2</sub> (L)) <sub>2</sub> (4,4-bpy)] ( <b>3</b> ) |         |         |           |          |                     |
| D–H···A                                                      | D–H     | H···A   | D···A     | ∠D–H···A | Symmetry code       |
| C8–H8···O3                                                   | 0.95    | 2.53    | 3.159(5)  | 124      | 1–x, 1–y, 1–z       |
| C12–H12···O5                                                 | 0.95    | 2.30    | 3.171(5)  | 153      | 3/2–x, 1/2+y, 1/2–z |
| C14–H14···O3                                                 | 0.95    | 2.55    | 3.245(5)  | 130      | 1–x, 1–y, 1–z       |



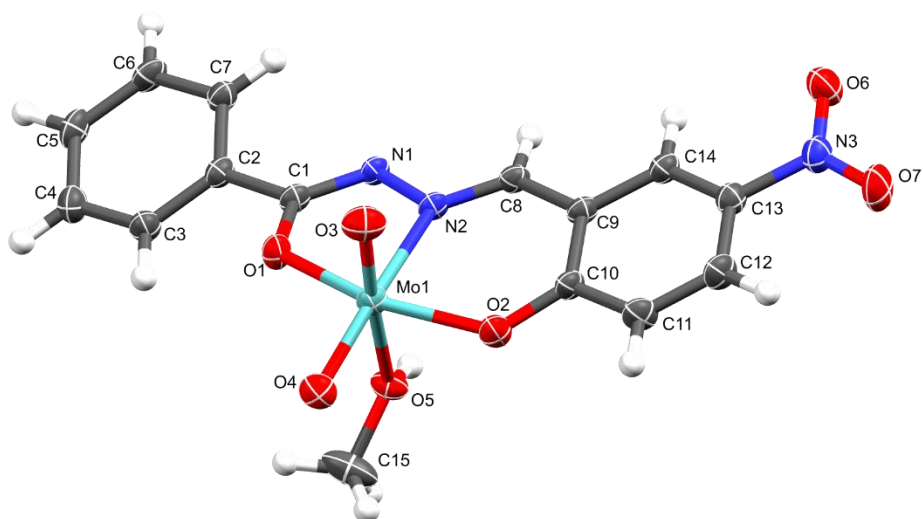

(a)

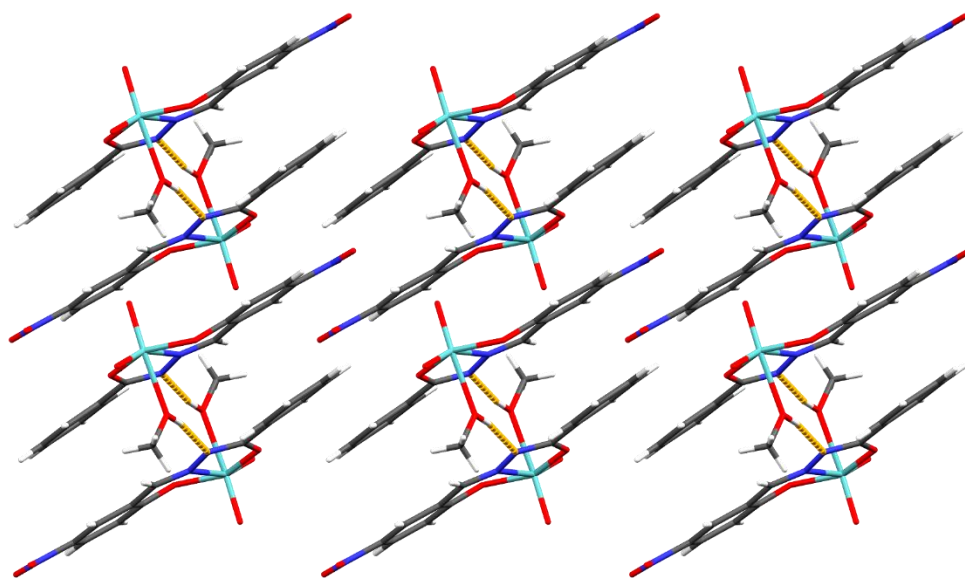

(b)

**Figure S9.** (a) Molecular structure level of  $[\text{MoO}_2(\text{L})(\text{MeOH})]$  (**1**). Atoms are shown as thermal ellipsoid with 50% probability level. The asymmetric unit contains one whole molecule of the complex. (b) Packing of mononuclear complexes  $[\text{MoO}_2(\text{L})(\text{MeOH})]$  (**1**) in the crystal structure. The molecules form supramolecular  $R_2^2(10)$  homodimers formed by methanol  $\text{O}-\text{H}\cdots\text{N1}$  imido hydrogen bonds. No other significant interactions between the dimers are observed.

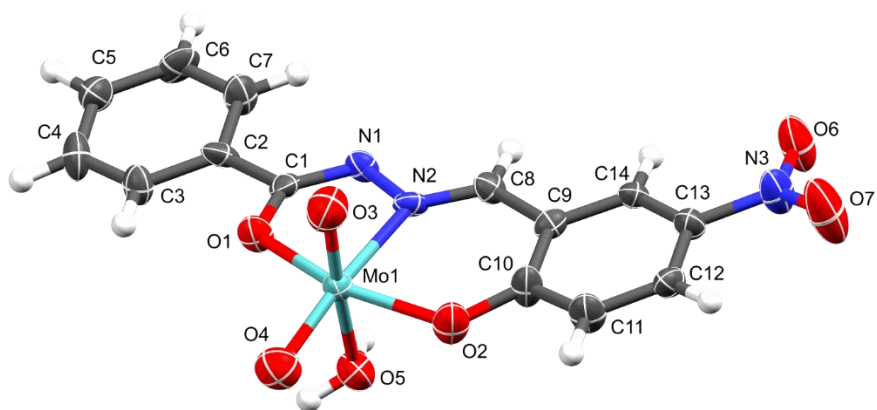

(a)

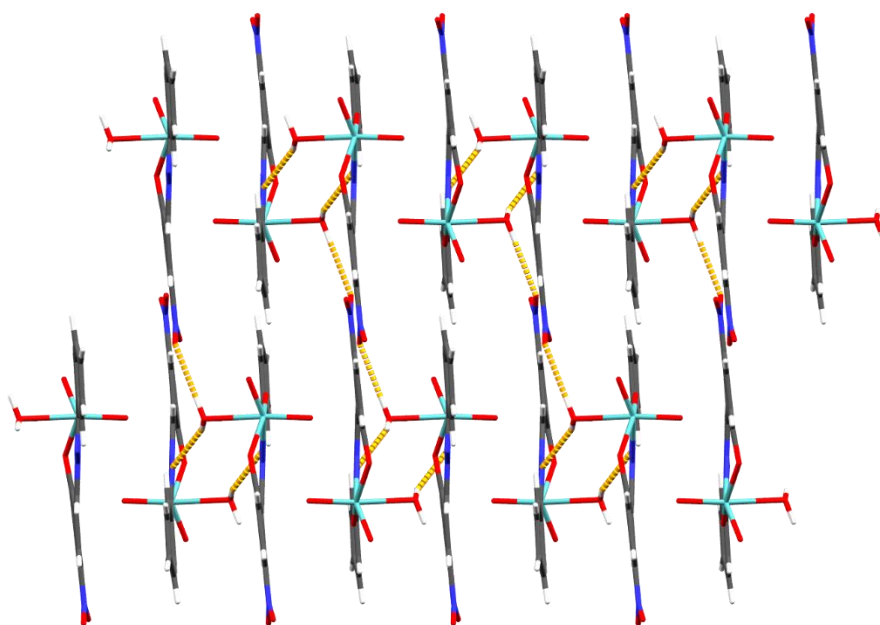

(b)

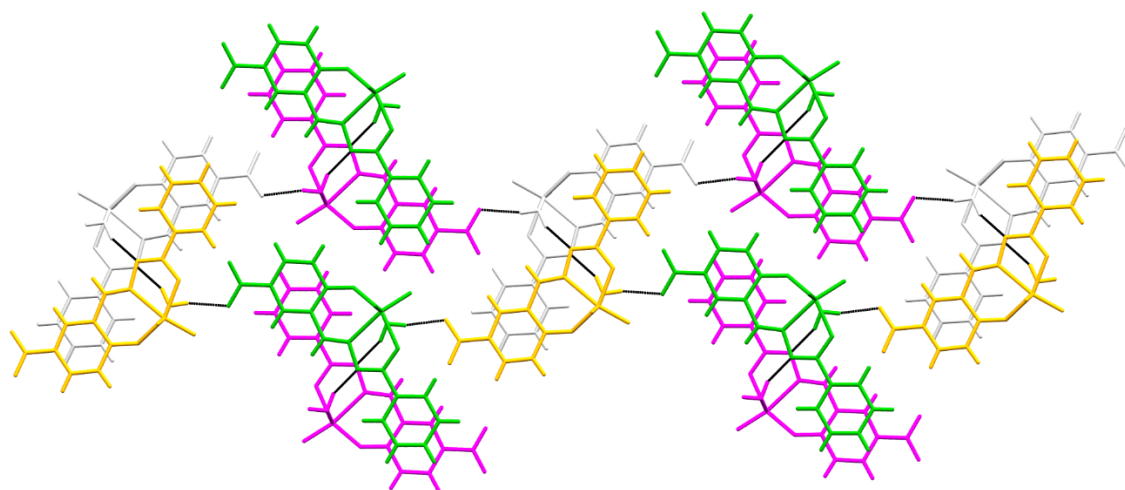

(c)

**Figure S10.** (a) Molecular structure of  $[\text{MoO}_2(\text{L})(\text{H}_2\text{O})]$  (**2**). Atoms are shown as thermal ellipsoid with a 50% probability level. The asymmetric unit contains one whole molecule of the complex. (b) Packing of mononuclear complexes  $[\text{MoO}_2(\text{L})(\text{H}_2\text{O})]$  (**2**) in the crystal structure. The molecules form supramolecular  $C_4^4$ (**26**) chains spanning through water  $\text{O}-\text{H}\cdots\text{O6}(\text{nitro})$  hydrogen bonds and water  $\text{O}-\text{H}\cdots\text{N1}$  imido hydrogen bond. The latter enables the formation of supramolecular homodimers connected via hydrogen bonds with nitro moiety. (c) Packing of mononuclear complexes **2** in the crystal structure. Molecules are colored by symmetry operation, showing the formation of supramolecular dimers bridged by  $\text{O}-\text{H}\cdots\text{O6}(\text{nitro})$  hydrogen bonds.

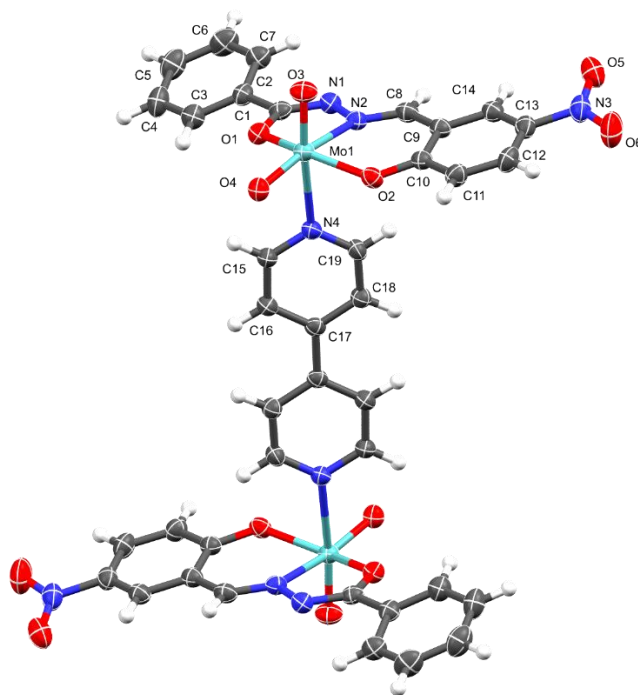

(a)

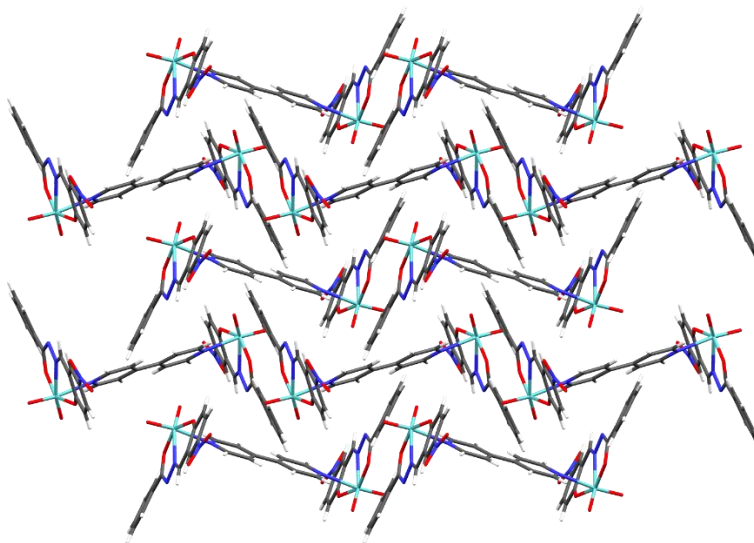

(b)

**Figure S11.** (a) Molecular structure of  $[(\text{MoO}_2(\text{L}))_2(4,4\text{-bpy})]$  (**3**). Atoms are shown as thermal ellipsoid with a 50% probability level. The asymmetric unit contains the upper half of the shown molecule only (center of inversion is situated at the midpoint of 4,4'-bpy C–C bond). (b) Packing of dinuclear complexes  $[(\text{MoO}_2(\text{L}))_2(4,4\text{-bpy})]$  (**3**) in the crystal structure. The molecules do not form any significant intermolecular interactions due to the lack of hydrogen bond donors.
